# Supplementary material
Source: publisher site journal article supplement (https://www.dovepress.com/article/382288)
Supplement: Supplementary file 1 [file get_supplementary_file.php]

**SUPPLEMENTARY MATERIALS**

| **Supplementary Table 1: East African Community DALYs lost across all ages in 2019** | | | | | | | | |
| --- | --- | --- | --- | --- | --- | --- | --- | --- |
| **Cause name** | **Burundi** | **DRC** | **Kenya** | **Rwanda** | **South Sudan** | **Uganda** | **Tanzania** | **TOTAL** |
| Malaria | 613,949 | 4,809,240 | 603,608 | 251,111 | 423,020 | 1,908,643 | 1,406,893 | 10,016,463 |
| Leishmaniasis | 0 | 37,052 | 13,438 | 0 | 68,556 | 1,764 | 0 | 120,810 |
| African trypanosomiasis | 0 | 16,643 | 0 | 0 | 271 | 2,779 | 220 | 19,913 |
| Schistosomiasis | 19,718 | 82,135 | 82,726 | 18,935 | 7,238 | 34,020 | 56,185 | 300,958 |
| Cysticercosis | 3,052 | 40,440 | 11,053 | 2,790 | 1,378 | 9,004 | 7,873 | 75,589 |
| Cystic echinococcosis | 103 | 1,351 | 1,142 | 56 | 369 | 1,224 | 808 | 5,053 |
| Lymphatic filariasis | 0 | 40,253 | 18,227 | 0 | 3,179 | 9,935 | 14,885 | 86,478 |
| Onchocerciasis | 16,564 | 626,593 | 0 | 0 | 88,536 | 22,958 | 18,752 | 773,403 |
| Trachoma | 62 | 490 | 463 | 0 | 1,576 | 192 | 561 | 3,344 |
| Dengue | 378 | 4,519 | 1,939 | 382 | 390 | 1,742 | 2,483 | 11,832 |
| Yellow fever | 12,850 | 11,318 | 2,613 | 1,095 | 4,782 | 6,836 | 5,487 | 44,982 |
| Rabies | 3,973 | 1,616 | 5,923 | 3,159 | 1,823 | 6,881 | 19,224 | 42,599 |
| Intestinal nematode infections | 8,408 | 95,446 | 13,761 | 15,834 | 10,723 | 25,861 | 59,367 | 229,399 |
| Food-borne trematodiases | 0 | 0 | 0 | 0 | 0 | 0 | 0 | 0 |
| Other neglected tropical diseases | 5,323 | 42,542 | 12,175 | 3,738 | 5,564 | 16,192 | 35,397 | 120,931 |
| Leprosy | 133 | 1,000 | 60 | 20 | 243 | 90 | 224 | 1,769 |
| Ebola | 0 | 194,966 | 0 | 0 | 0 | 428 | 0 | 195,394 |
| **TOTAL** | **684,513** | **6,005,603** | **767,127** | **297,120** | **617,647** | **2,048,548** | **1,628,359** | **12,048,918** |

Source: Global Burden of Disease Collaborative Network [4].

| **Supplementary Table 2: East African Community DALYs lost among 0-14 years old in 2019** | | | | | | | | |
| --- | --- | --- | --- | --- | --- | --- | --- | --- |
| **Cause**  **name** | **Burundi** | **DRC** | **Kenya** | **Rwanda** | **South Sudan** | **Uganda** | **Tanzania** | **Total** |
| Malaria | 555,210 | 4,264,294 | 469,408 | 202,660 | 378,915 | 1,698,849 | 1,256,614 | 8,828,892 |
| Leishmaniasis | 0 | 26,842 | 9,377 | 0 | 56,154 | 1,324 | 0 | 93,696 |
| African trypanosomiasis | 0 | 4,941 | 0 | 0 | 98 | 985 | 87 | 6,111 |
| Schistosomiasis | 1,958 | 11,308 | 13,106 | 2,526 | 1,333 | 719 | 8,343 | 39,293 |
| Cysticercosis | 82 | 845 | 174 | 53 | 203 | 211 | 264 | 1,831 |
| Cystic echinococcosis | 54 | 466 | 346 | 26 | 252 | 665 | 471 | 2,280 |
| Lymphatic filariasis | 0 | 9,540 | 4,515 | 0 | 940 | 3,545 | 4,643 | 23,184 |
| Onchocerciasis | 3,328 | 110,042 | 0 | 0 | 15,019 | 3,291 | 3,092 | 134,773 |
| Dengue | 180 | 1,916 | 755 | 0 | 186 | 817 | 1,126 | 4,979 |
| Yellow fever | 6,763 | 5,135 | 1,093 | 155 | 2,615 | 3,679 | 3,045 | 22,485 |
| Rabies | 2,366 | 1,034 | 2,904 | 518 | 1,253 | 4,230 | 12,649 | 24,955 |
| Intestinal nematode infections | 3,854 | 51,831 | 5,828 | 1,728 | 5,265 | 12,593 | 28,444 | 109,543 |
| Food-borne trematodiases | 0 | 0 | 0 | 0 | 0 | 0 | 0 | 0 |
| Other neglected tropical diseases | 4,813 | 35,901 | 8,143 | 0 | 4,730 | 14,414 | 29,864 | 97,865 |
| Leprosy | 0 | 1 | 0 | 2,961 | 0 | 0 | 1 | 2,963 |
| Ebola | 0 | 44,202 | 0 | 0 | 0 | 344 | 0 | 44,546 |
| **TOTAL** | **578,609** | **4,568,298** | **515,648** | **210,627** | **466,962** | **1,745,668** | **1,348,641** | **9,434,454** |

Source: Global Burden of Disease Collaborative Network [4].

| **Supplementary Table 3: East African Community DALYs lost among 15 years old and above in 2019** | | | | | | | | |
| --- | --- | --- | --- | --- | --- | --- | --- | --- |
| **Cause name** | **Burundi** | **DRC** | **Kenya** | **Rwanda** | **South Sudan** | **Uganda** | **Tanzania** | **Total** |
| Malaria | 58,739 | 542,004 | 134,200 | 48,450 | 44,105 | 209,794 | 150,279 | 1,187,572 |
| Chagas disease | 0 | 0 | 0 | 0 | 0 | 0 | 0 | 0 |
| Leishmaniasis | 0 | 10,210 | 4,061 | 0 | 12,402 | 440 | 0 | 27,114 |
| African trypanosomiasis | 0 | 11,702 | 0 | 0 | 173 | 1,794 | 133 | 13,803 |
| Schistosomiasis | 17,761 | 70,828 | 69,620 | 16,409 | 5,905 | 33,301 | 47,842 | 261,666 |
| Cysticercosis | 2,969 | 39,595 | 10,879 | 2,738 | 1,175 | 8,793 | 7,609 | 73,758 |
| Cystic echinococcosis | 48 | 885 | 796 | 30 | 117 | 560 | 337 | 2,773 |
| Lymphatic filariasis | 0 | 30,712 | 13,712 | 0 | 2,238 | 6,390 | 10,242 | 63,294 |
| Onchocerciasis | 13,235 | 516,551 | 0 | 0 | 73,517 | 19,667 | 15,660 | 638,630 |
| Trachoma | 62 | 490 | 463 | 0 | 1,576 | 192 | 561 | 3,344 |
| Dengue | 198 | 2,603 | 1,184 | 382 | 205 | 924 | 1,357 | 6,853 |
| Yellow fever | 6,087 | 6,183 | 1,520 | 940 | 2,167 | 3,157 | 2,442 | 22,497 |
| Rabies | 1,607 | 582 | 3,018 | 2,640 | 571 | 2,651 | 6,575 | 17,644 |
| Intestinal nematode infections | 4,554 | 43,615 | 7,933 | 14,105 | 5,458 | 13,268 | 30,923 | 119,856 |
| Food-borne trematodiases | 0 | 0 | 0 | 0 | 0 | 0 | 0 | 0 |
| Other neglected tropical diseases | 510 | 6,641 | 4,032 | 3,738 | 834 | 1,777 | 5,533 | 23,066 |
| Leprosy | 133 | 999 | 60 | 0 | 242 | 90 | 223 | 1,747 |
| Ebola | 0 | 150,764 | 0 | 0 | 0 | 84 | 0 | 150,848 |
| Zika virus | 0 | 0 | 0 | 0 | 0 | 0 | 0 | 0 |
| Guinea worm disease | 0 | 0 | 0 | 0 | 0 | 0 | 0 | 0 |
| **TOTAL** | **105,904** | **1,434,365** | **251,479** | **89,433** | **150,685** | **302,880** | **279,718** | **2,614,464** |

Source: Global Burden of Disease Collaborative Network [4].

| **Supplementary Table 4: East African Community monetary value of DALYs lost across all ages in 2019 (Int$ or PPP, 2019)** | | | | | | | | |
| --- | --- | --- | --- | --- | --- | --- | --- | --- |
| **Cause name** | **Burundi** | **DRC** | **Kenya** | **Rwanda** | **South Sudan** | **Uganda** | **Tanzania** | **TOTAL** |
| Malaria | 468,130,204 | 5,305,986,187 | 2,968,320,900 | 556,986,661 | 337,998,615 | 4,926,245,429 | 3,856,884,126 | 18,420,552,122 |
| Chagas disease | 0 | 0 | 0 | 0 | 0 | 0 | 0 | 0 |
| Leishmaniasis | 0 | 40,879,090 | 66,081,396 | 0 | 54,777,197 | 4,554,103 | 0 | 166,291,786 |
| African trypanosomiasis | 0 | 18,362,124 | 0 | 0 | 216,361 | 7,173,218 | 603,534 | 26,355,238 |
| Schistosomiasis | 15,035,140 | 90,619,234 | 406,815,686 | 41,999,561 | 5,783,317 | 87,807,388 | 154,026,601 | 802,086,927 |
| Cysticercosis | 2,326,863 | 44,616,700 | 54,353,158 | 6,189,557 | 1,101,266 | 23,238,238 | 21,582,749 | 153,408,531 |
| Cystic echinococcosis | 78,278 | 1,490,434 | 5,617,140 | 124,188 | 294,500 | 3,160,398 | 2,215,099 | 12,980,036 |
| Lymphatic filariasis | 0 | 44,410,263 | 89,633,553 | 0 | 2,539,840 | 25,641,237 | 40,805,386 | 203,030,279 |
| Onchocerciasis | 12,629,779 | 691,313,560 | 0 | 0 | 70,741,211 | 59,255,608 | 51,407,713 | 885,347,871 |
| Trachoma | 47,523 | 540,450 | 2,276,556 | 0 | 1,259,410 | 496,669 | 1,537,208 | 6,157,816 |
| Dengue | 287,942 | 4,985,777 | 9,533,786 | 847,064 | 311,836 | 4,494,947 | 6,806,925 | 27,268,276 |
| Yellow fever | 9,798,218 | 12,487,479 | 12,849,628 | 2,429,572 | 3,820,895 | 17,643,399 | 15,043,225 | 74,072,415 |
| Rabies | 3,029,501 | 1,782,843 | 29,126,023 | 7,006,258 | 1,456,971 | 17,760,023 | 52,701,772 | 112,863,391 |
| Intestinal nematode infections | 6,410,711 | 105,304,144 | 67,670,653 | 35,120,407 | 8,567,990 | 66,747,315 | 162,750,644 | 452,571,864 |
| Food-borne trematodiases | 0 | 0 | 0 | 0 | 0 | 0 | 0 | 0 |
| Other neglected tropical diseases | 4,058,987 | 46,936,088 | 59,870,508 | 8,291,744 | 4,445,639 | 41,790,633 | 97,038,242 | 262,431,841 |
| Leprosy | 101,360 | 1,103,194 | 296,634 | 43,925 | 193,802 | 231,469 | 613,528 | 2,583,912 |
| Ebola | 0 | 215,104,248 | 0 | 0 | 0 | 1,104,469 | 0 | 216,208,717 |
| Zika virus | 0 | 0 | 0 | 0 | 0 | 0 | 0 | 0 |
| Guinea worm disease | 0 | 0 | 0 | 0 | 54 | 0 | 0 | 54 |
| **TOTAL** | **521,934,505** | **6,625,921,817** | **3,772,445,620** | **659,038,937** | **493,508,902** | **5,287,344,542** | **4,464,016,752** | **21,824,211,076** |

Source: Authors' estimations.

| **Supplementary Table 5: Potential economic productivity loss per NTD among 15 years old and above adjusted for labour force participation and the combined rates of unemployment and time-related underemployment (Int$, 2019)** | | | | | | | | |
| --- | --- | --- | --- | --- | --- | --- | --- | --- |
| **NTD name** | **Burundi** | **DRC** | **Kenya** | **Rwanda** | **South Sudan** | **Uganda** | **Tanzania** | **Total** |
| Malaria | 30,047,276 | 281,652,018 | 413,786,733 | 48,467,820 | 20,016,510 | 251,789,329 | 264,490,174 | 1,310,249,860 |
| Chagas disease | 0 | 0 | 0 | 0 | 0 | 0 | 0 | 0 |
| Leishmaniasis | 0 | 5,305,815 | 12,521,320 | 0 | 5,628,545 | 528,379 | 0 | 23,984,058 |
| African trypanosomiasis | 0 | 6,081,145 | 0 | 0 | 78,612 | 2,153,121 | 233,929 | 8,546,807 |
| Schistosomiasis | 9,085,377 | 36,805,533 | 214,661,618 | 16,414,668 | 2,680,115 | 39,967,461 | 84,201,682 | 403,816,455 |
| Cysticercosis | 1,518,992 | 20,575,551 | 33,544,275 | 2,738,755 | 533,248 | 10,552,551 | 13,392,250 | 82,855,622 |
| Cystic echinococcosis | 24,649 | 459,958 | 2,455,581 | 29,843 | 52,990 | 671,626 | 593,630 | 4,288,279 |
| Lymphatic filariasis | 0 | 15,959,580 | 42,277,432 | 0 | 1,015,913 | 7,668,628 | 18,025,483 | 84,947,036 |
| Onchocerciasis | 6,770,418 | 268,425,468 | 0 | 0 | 33,364,774 | 23,603,729 | 27,561,946 | 359,726,335 |
| Trachoma | 31,882 | 254,552 | 1,427,400 | 0 | 715,345 | 230,951 | 986,888 | 3,647,018 |
| Dengue | 101,132 | 1,352,841 | 3,650,289 | 382,026 | 92,884 | 1,109,062 | 2,389,018 | 9,077,252 |
| Yellow fever | 3,113,686 | 3,213,115 | 4,687,389 | 940,757 | 983,507 | 3,788,449 | 4,298,712 | 21,025,615 |
| Rabies | 821,971 | 302,277 | 9,306,580 | 2,641,372 | 259,019 | 3,181,197 | 11,572,197 | 28,084,613 |
| Intestinal nematode infections | 2,329,461 | 22,664,474 | 24,460,734 | 14,110,488 | 2,476,990 | 15,923,532 | 54,424,506 | 136,390,186 |
| Food-borne trematodiases | 0 | 0 | 0 | 0 | 0 | 0 | 0 | 0 |
| Other neglected tropical diseases | 260,848 | 3,451,145 | 12,432,262 | 3,739,577 | 378,581 | 2,132,892 | 9,738,147 | 32,133,451 |
| Leprosy | 67,953 | 519,035 | 185,847 | 0 | 110,010 | 107,495 | 392,907 | 1,383,247 |
| Ebola | 0 | 78,344,617 | 0 | 0 | 0 | 100,618 | 0 | 78,445,235 |
| Zika virus | 0 | 0 | 0 | 0 | 0 | 0 | 0 | 0 |
| Guinea worm disease | 0 | 0 | 0 | 0 | 29 | 0 | 0 | 29 |
| **TOTAL** | **54,173,646** | **745,367,125** | **775,397,459** | **89,465,306** | **68,387,071** | **363,509,020** | **492,301,470** | **2,588,601,097** |

Source: Authors' estimations.
